# Supplementary material for: Effectiveness of an Interactive, Highly Tailored “Video Doctor” Intervention to Suppress Viral Load and Retain Patients With HIV in Clinical Care: A Randomized Clinical Trial
Source: PubMed Central journal article supplement — J Acquir Immune Defic Syndr. 2022 Jun 27;91(1):58–67. doi: 10.1097/QAI.0000000000003045 (PMC9377499; doi:10.1097/qai.0000000000003045), 2022-06-27

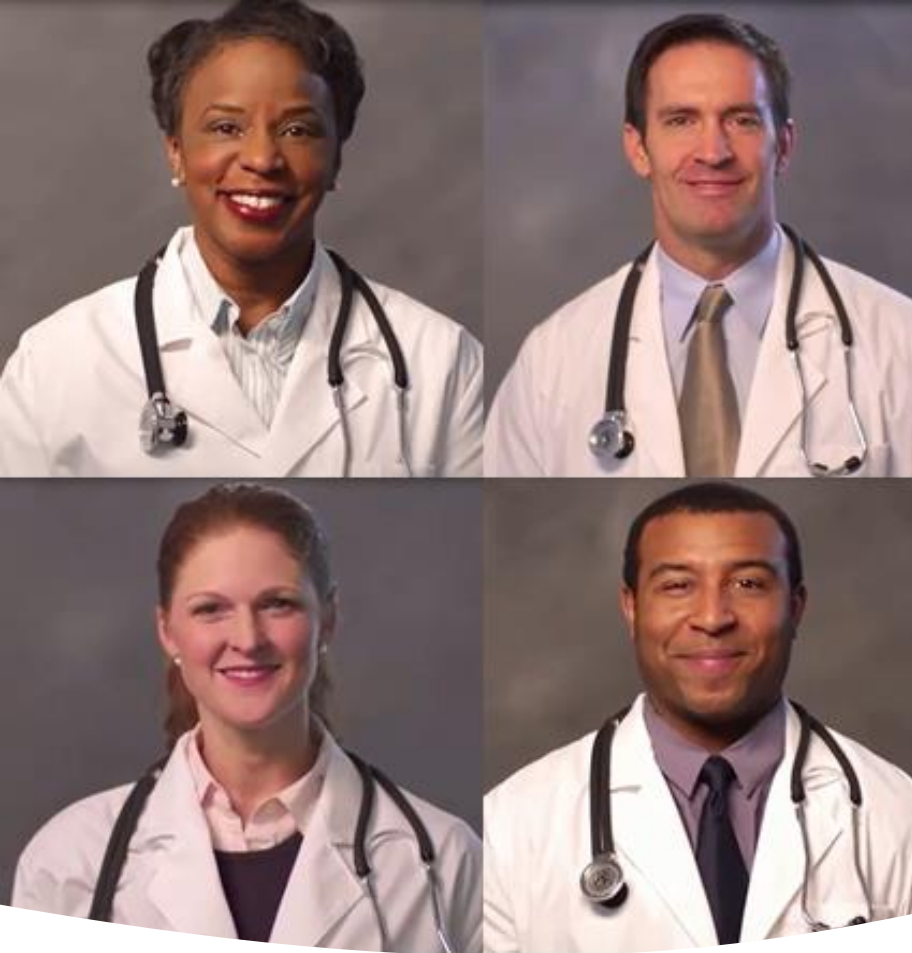

# positive<sup>+</sup><sup>+</sup>

## health check

Overview of the  
intervention

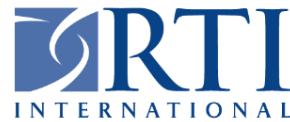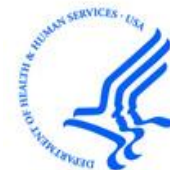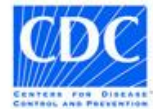

# What is Positive Health Check?

**An interactive Web-based video HIV intervention** that delivers tailored evidence-based prevention messages on:

- ❖ Treatment initiation
- ❖ Medication adherence
- ❖ Retention in care
- ❖ Sexual risk reduction
- ❖ Pregnancy planning
- ❖ Intravenous drug use

- **Features include:**

- **Customized Tips** to help patients manage medications and clinic appointments, and to increase protective behaviors
- **Handouts** to facilitate patient-provider communication
- **Extra Info** section to give patients additional resources and information on a variety of topics

# The Patient Experience

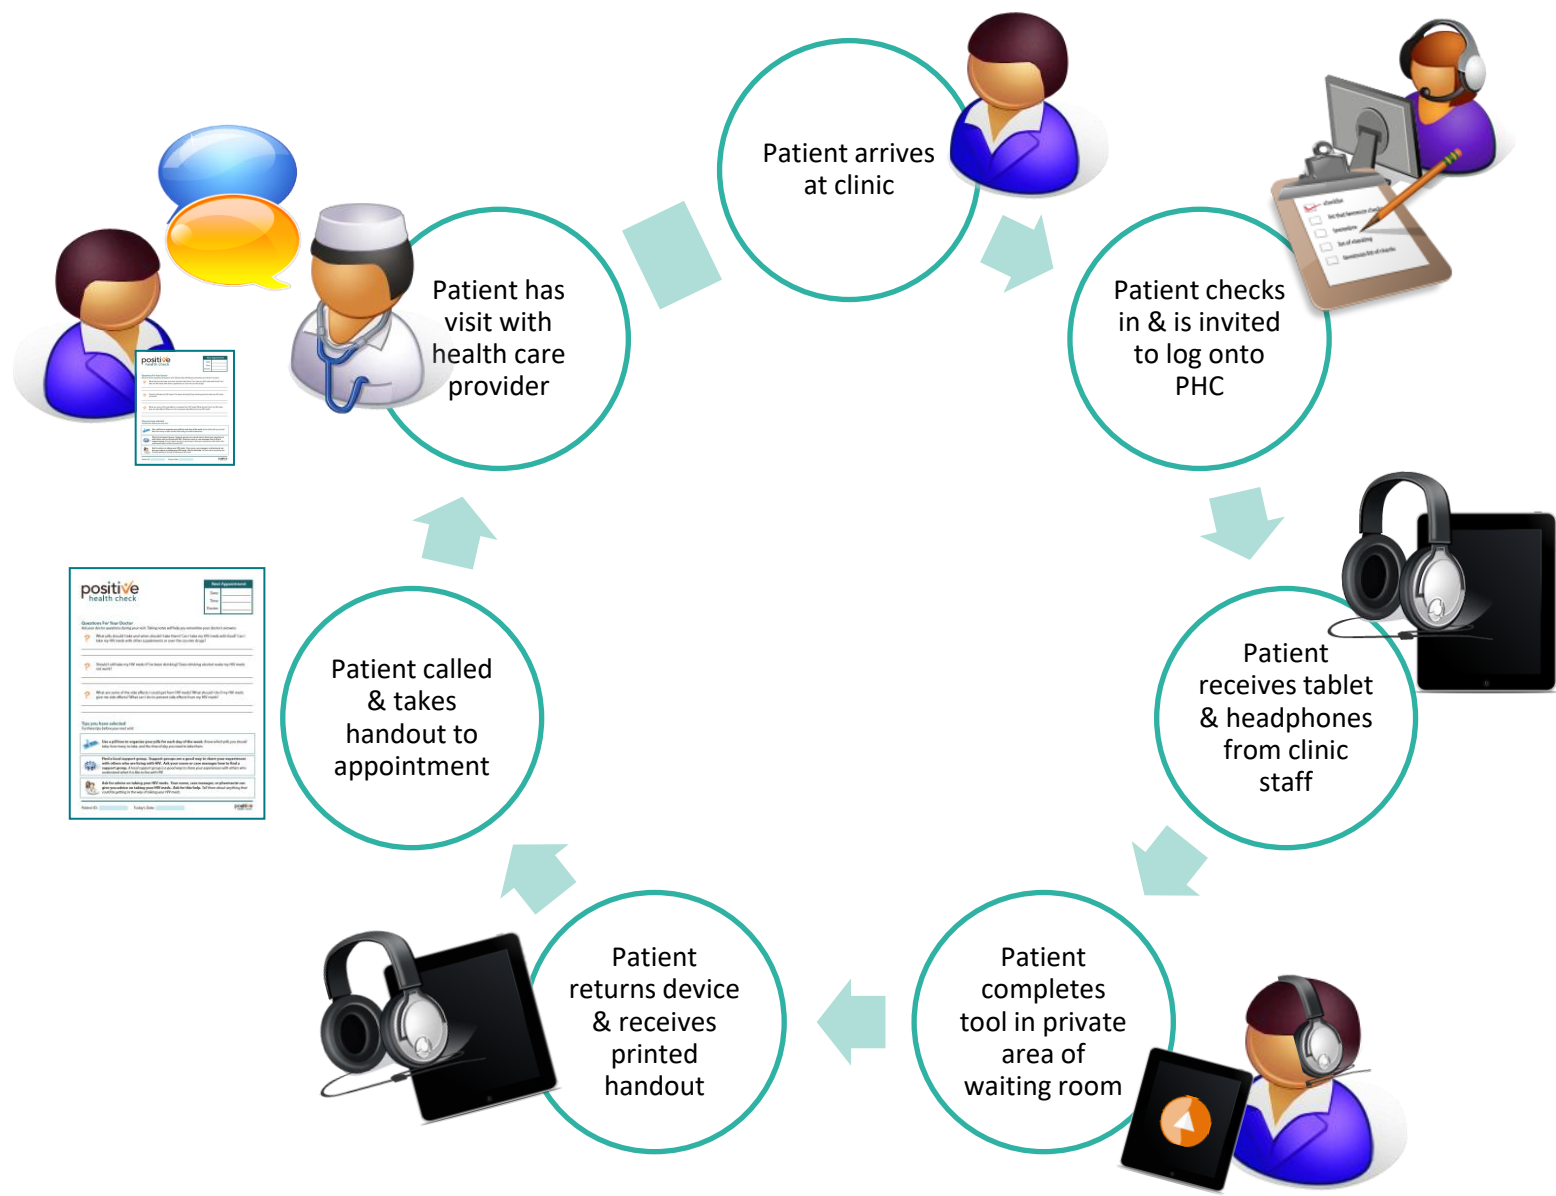

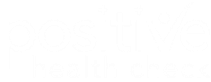

**Patients will...**

**Log in**



positive  
health check

Study ID

Password

Start

**Your Clinic**

Your Clinic's Address  
100 Healthy St.  
Healthy, USA 12345  
(123) 456-7890

positive  
health check

**Patient ID**

**Default Password**

If you have problems logging in, please ask the front desk for help.

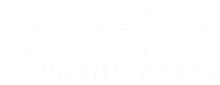

**Patients will...**

**Meet Nurse Carla**

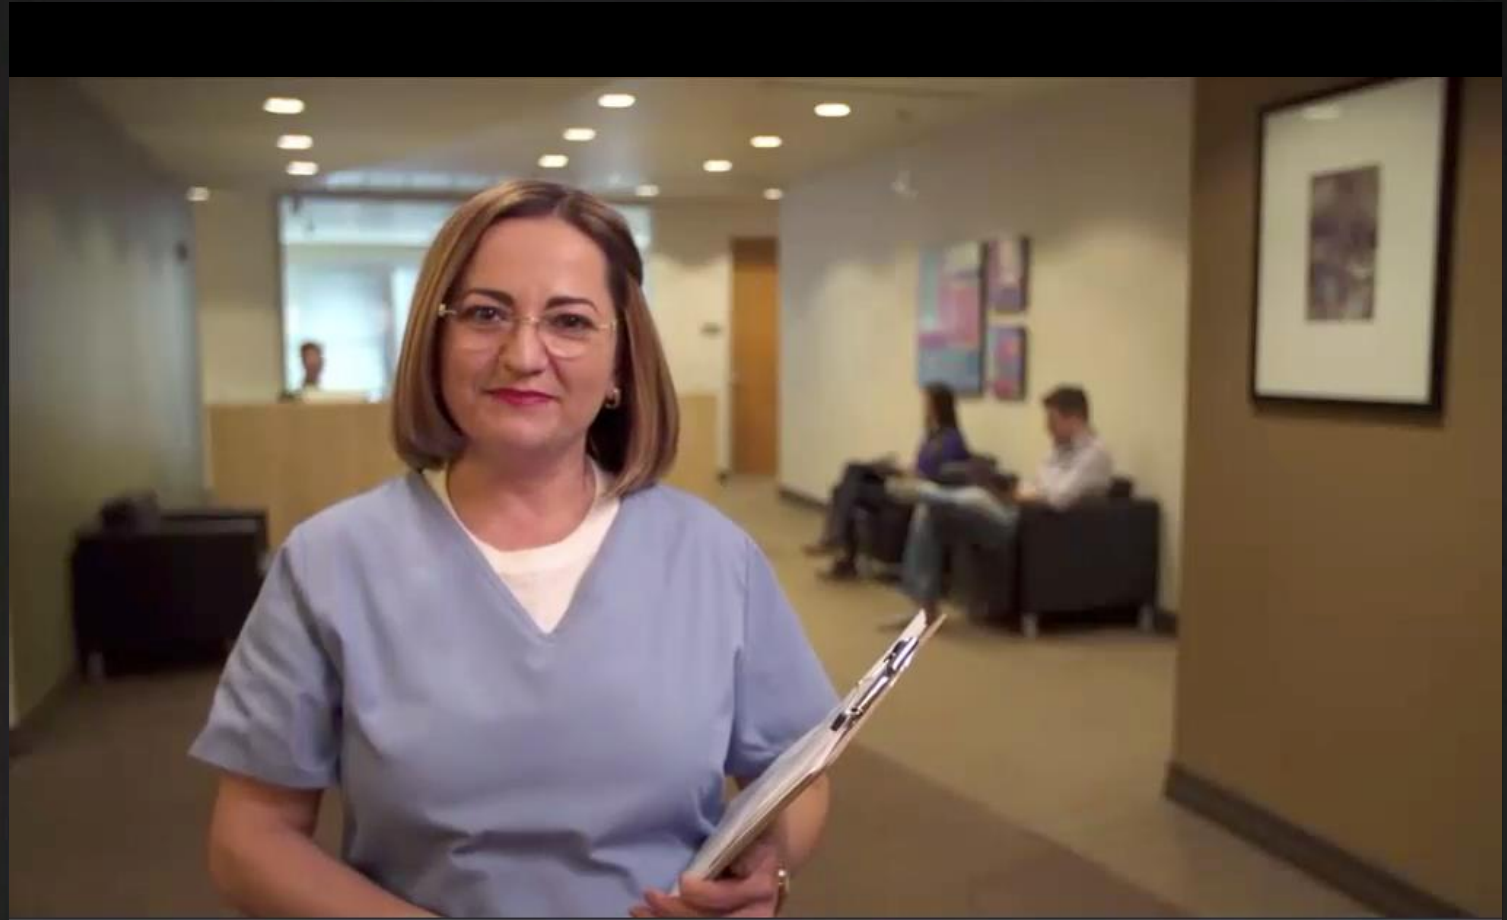

Exit

Skip

||

CC

Next

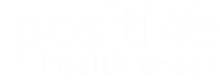

**Patients will...**

**Answer demographic questions**



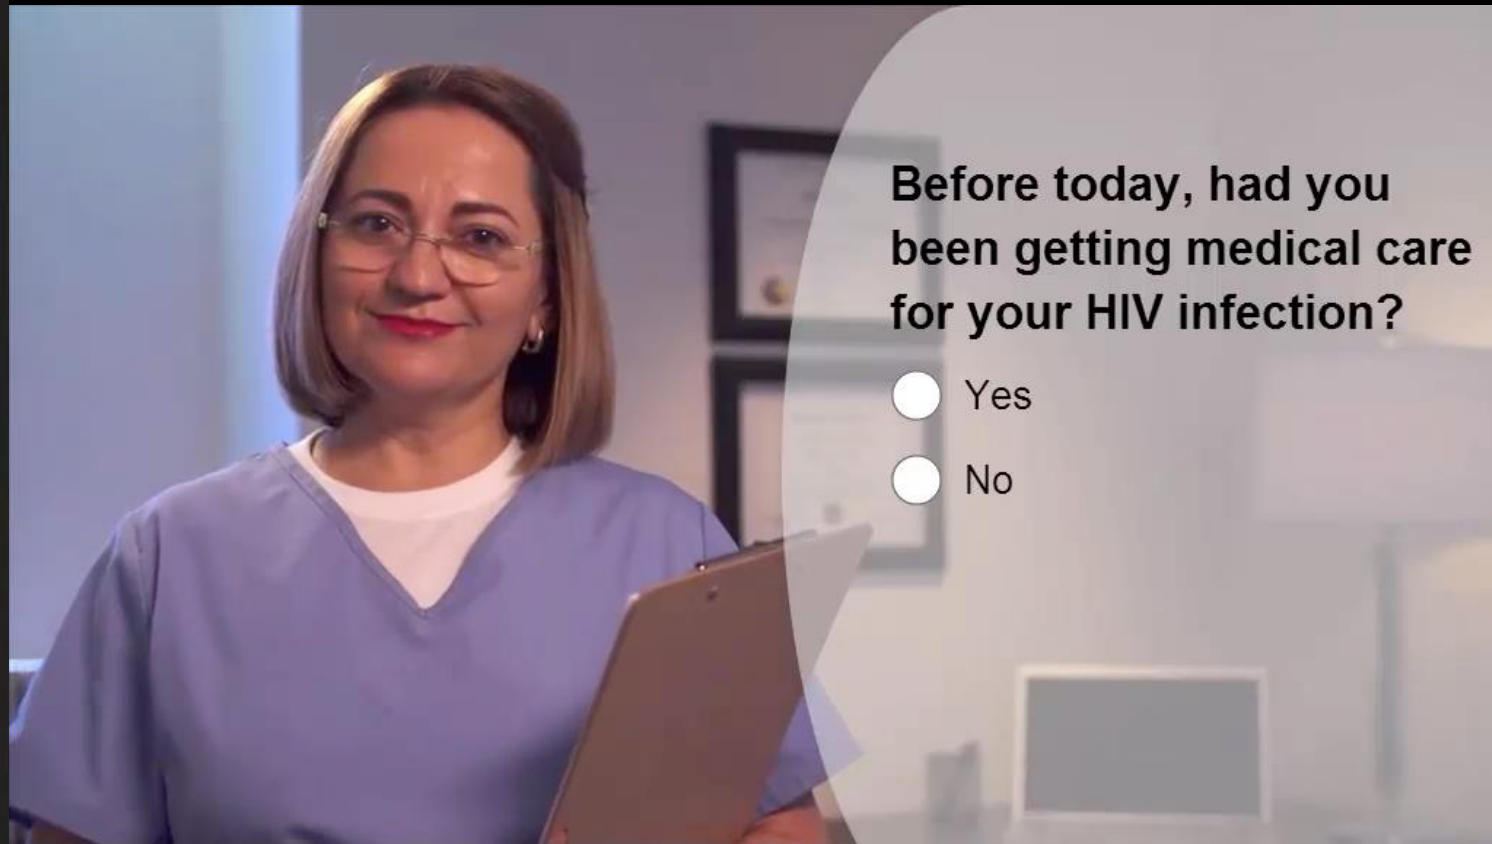

**Before today, had you been getting medical care for your HIV infection?**

- Yes
- No

Exit

Skip

||

CC

Next

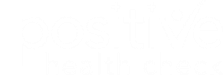

**Patients will...**

**Meet the virtual doctors (actors)**

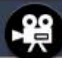

Dr. Edwards

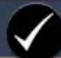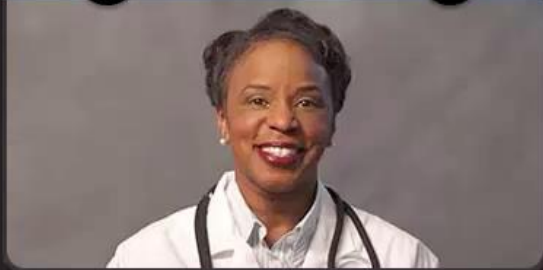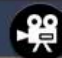

Dr. Williams

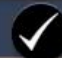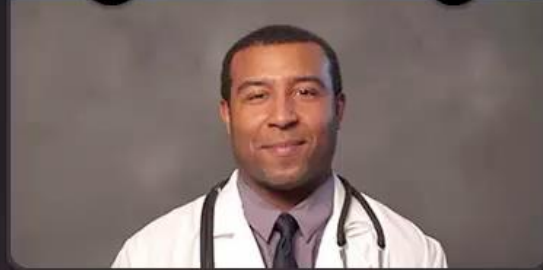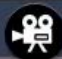

Dr. Baker

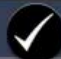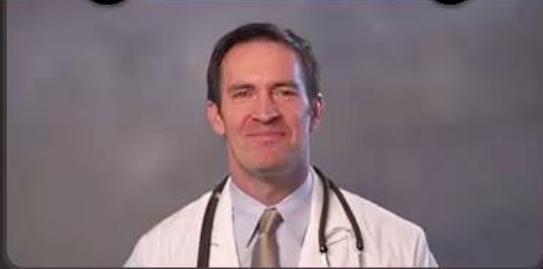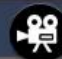

Dr. Wilson

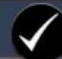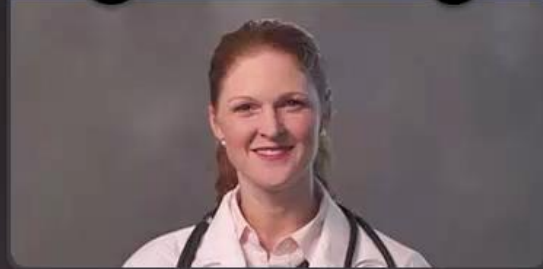

Exit

Skip

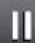

CC

Next

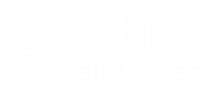

**Patients will...**

Select their virtual doctor

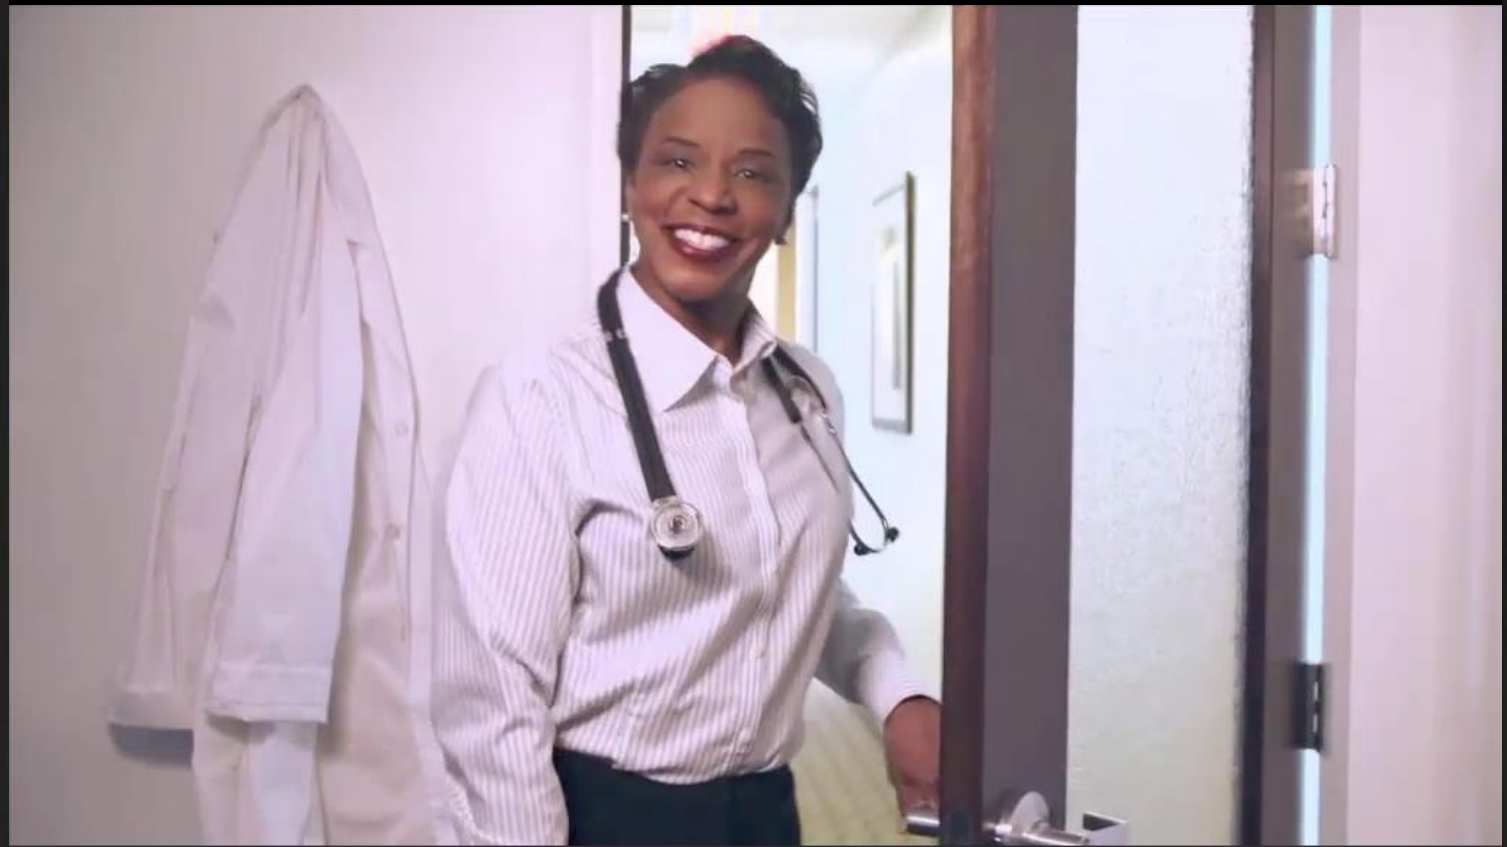

Exit

Skip

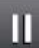

CC

Next

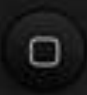

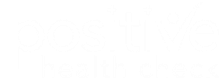

**Patients will...**

Answer questions about their  
health behavior

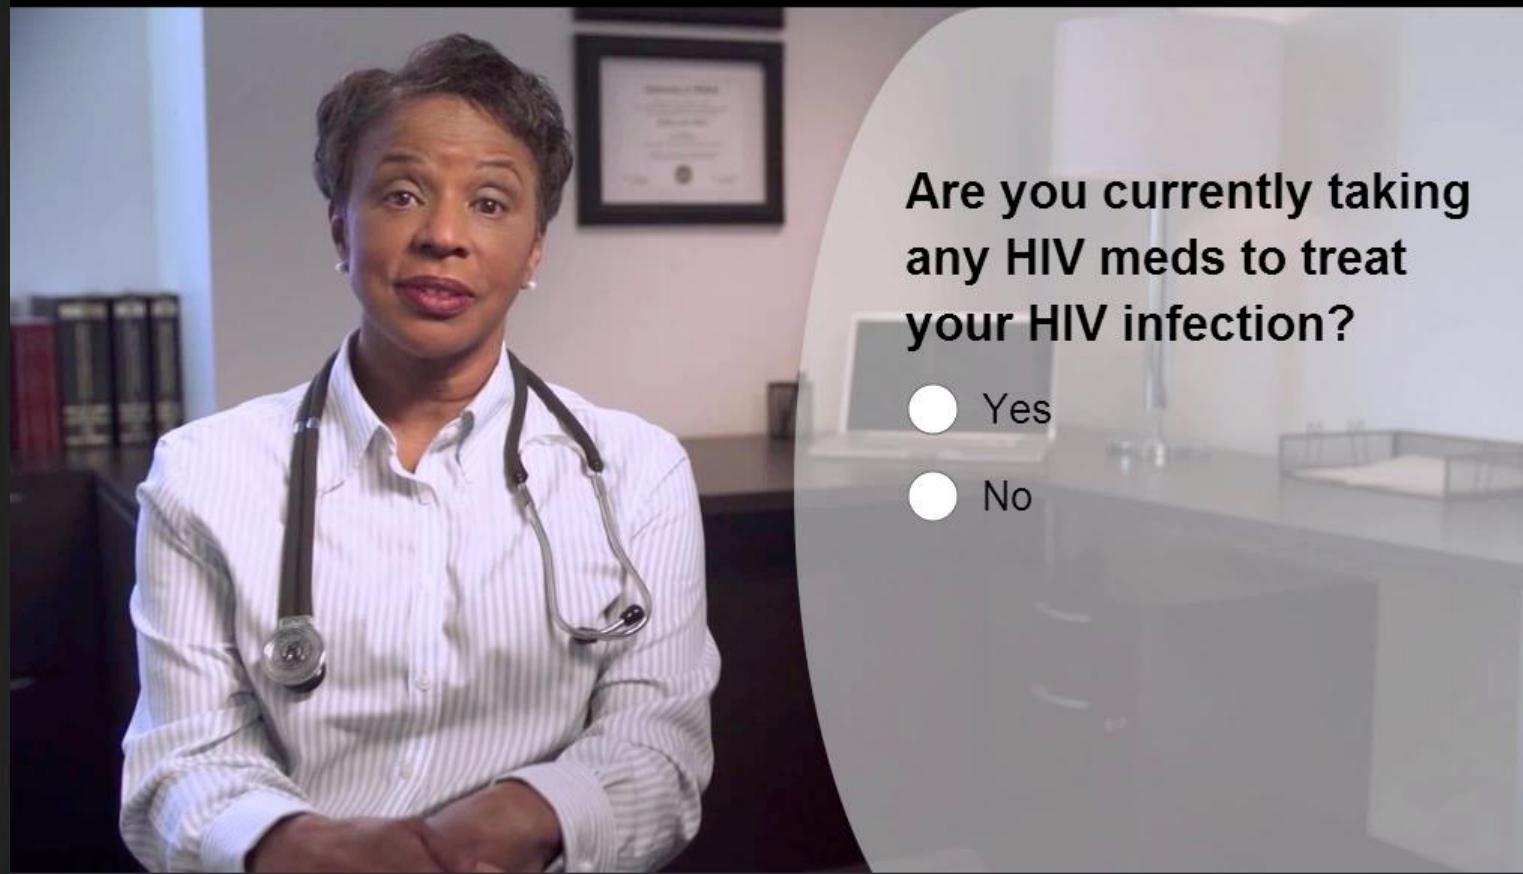

Are you currently taking any HIV meds to treat your HIV infection?

- Yes
- No

Exit

Skip

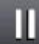

CC

Next

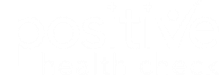

## **Patients will...**

Receive tailored messages & choose tips to practice before their next visit



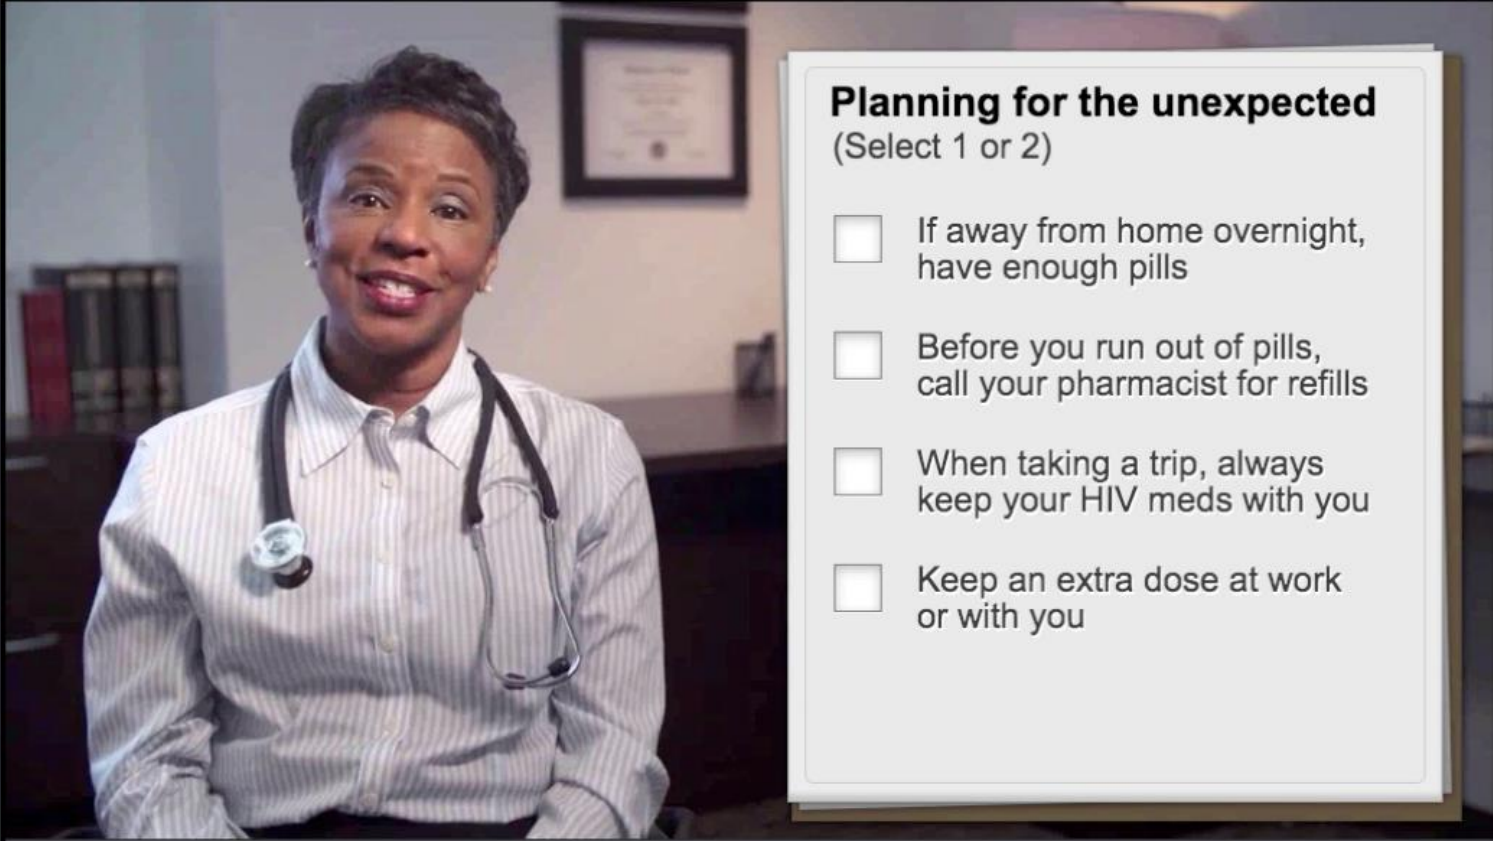

**Planning for the unexpected**

(Select 1 or 2)

- If away from home overnight, have enough pills
- Before you run out of pills, call your pharmacist for refills
- When taking a trip, always keep your HIV meds with you
- Keep an extra dose at work or with you

Exit Skip || CC Next



## Patients will...

Be prompted to talk to their doctors  
and ask questions

Will you talk to your doctor about side effects?

Rx

Yes

Rx

No  
Thanks

Exit

Skip

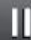

CC

Next



## Patients will...

Receive a handout with their selected questions for their doctor and tips to practice at home

# Sample Patient Handout

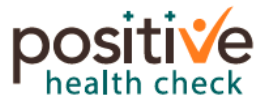

| Next Appointment |       |
|------------------|-------|
| Date:            | _____ |
| Time:            | _____ |
| Doctor:          | _____ |

### Questions For Your Doctor

Ask your doctor questions during your visit. Taking notes will help you remember your doctor's answers:

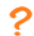

How should I take my HIV meds (with food or other supplements)?

---



---

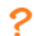

How should I handle taking my HIV meds when I've been drinking alcohol?

---



---

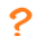

What side effects should I be concerned about and how do I deal with them?

---



---

### Tips you have selected

Try these tips before your next visit:

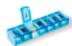

**Use a pill box to organize your pills for each day of the week.** Know which pills you should take, how many to take, and the time of day you need to take them.

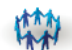

**Find a local support group.** Support groups are a good way to share your experiences with others who are living with HIV. Ask your nurse or case manager how to find a support group. A local support group is a good way to share your experiences with others who understand what it is like to live with HIV.

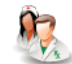

**Ask for advice on taking your HIV meds.** Your nurse, case manager, or pharmacist can give you advice on taking your HIV meds. Ask for this help. Tell them about anything that could be getting in the way of taking your HIV meds.

Patient ID: \_\_\_\_\_ Today's Date: \_\_\_\_\_

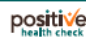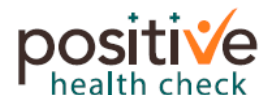

### Additional Questions

Follow these links for answers to your additional questions:

- ✓ What should I do if I miss a dose of my HIV meds?  
<http://bit.ly/treatmentadherence>
- ✓ Where can I find help to pay for my HIV meds?  
<http://bit.ly/HIVtreatmentcosts>
- ✓ What can I do to help me remember to take my HIV meds on time?  
<http://bit.ly/medadherenceapps>
- ✓ Where can I find an HIV support group?  
<http://bit.ly/HIVsupport>
- ✓ Should I or should my partner get tested for STDs?  
<http://bit.ly/STDtestinglocations>

### Additional Tips

Keep these tips in mind and consider trying them before your next visit:

- ✓ Use a pill box to organize your pills for each day of the week.
- ✓ Protect partners by telling them you have HIV before you have sex with them.
- ✓ Line up transportation to the clinic or child care if you need someone to help you

Patient ID: \_\_\_\_\_ Today's Date: \_\_\_\_\_

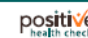

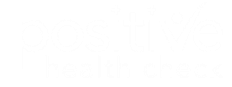

## Patients will...

Have the opportunity for self-guided exploration of additional information

# Extra Info Section

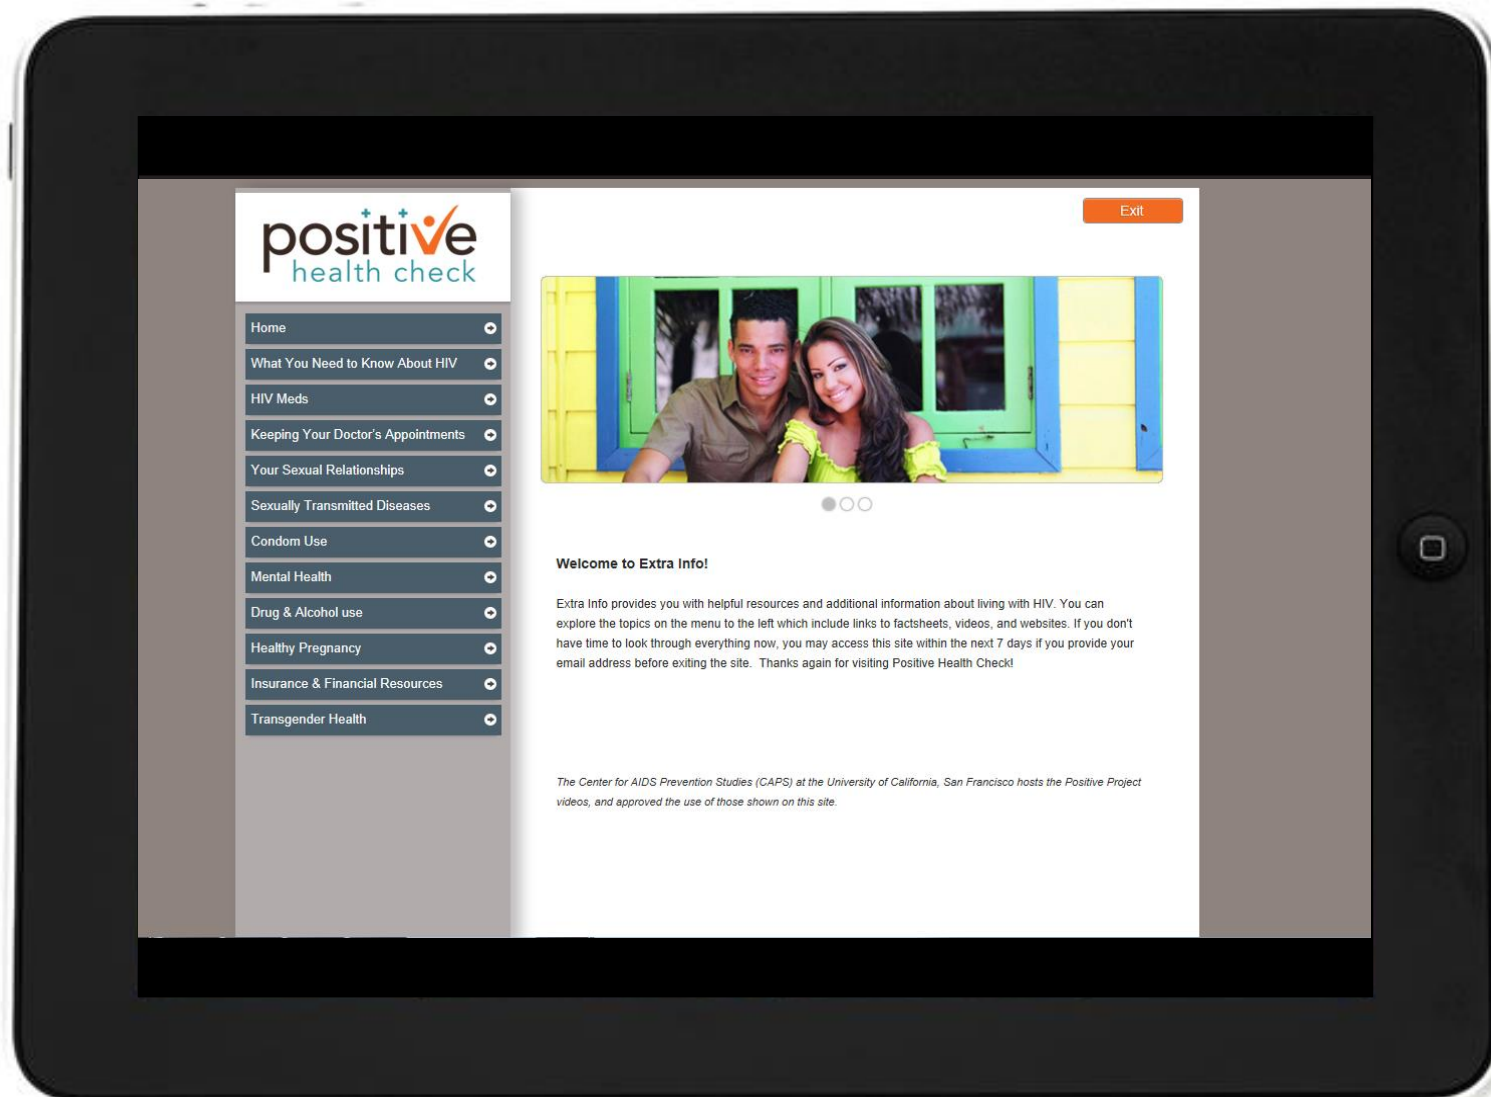

Supplement: qai-91-58-s001.pdf [file qai-91-58-s001.pdf]
